# Supplementary material for: Evolution of nucleophilic high molecular-weight organic compounds in ambient aerosols: a case study
Source: Copernicus journal article supplement (doi:10.5194/acp-24-1627-2024), 2024-02-06
Supplement: Supplementary file 1 [file acp-24-1627-2024-supplement.pdf]

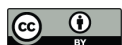

*Supplement of*

## **Evolution of nucleophilic high molecular-weight organic compounds in ambient aerosols: a case study**

**Chen He et al.**

*Correspondence to:* Yang Chen ([chenyang@cigit.ac.cn](mailto:chenyang@cigit.ac.cn))

The copyright of individual parts of the supplement might differ from the article licence.

## 1. Methods

### 1.1 FT-ICR MS analysis

The mass spectrometer was initially calibrated using sodium formate and then recalibrated with a known mass series in natural organic matter (Suwannee River fulvic acids), which contains a relatively high abundance of CHO formulae, providing a mass accuracy of 0.2 ppm or higher throughout the mass range of interest.

FT-ICR MS was calibrated using a reference list formed by the manually assigned known formula in Data Analysis. Mass peaks with a signal-to-noise (S/N) ratio  $\geq 4$  were exported to a data sheet. Data analysis was performed using in-house software.

The assigned formulae were limited in the following elemental composition:  $^{12}\text{C}_{0-100}$ ,  $^1\text{H}_{0-200}$ ,  $^{14}\text{N}_{0-10}$ ,  $^{16}\text{O}_{0-20}$ , and  $^{32}\text{S}_{0-2}$ . The formula assignment section set the mass accuracy window was set to 1.0 ppm in formula assignment section. All elemental formulae should meet basic chemical criteria: (1) the number of H atoms should be at least 1/3 that of C atoms and cannot be greater than that of  $2\text{C} + \text{N} + 2$ ; (2) the sum number of N and H atoms should be even; and (3) the H/C and O/C value should be restricted to be less than 3 and 1.5, respectively (He et al., 2020; Kujawinski and Behn, 2006).

These compound groups were: ; lipids (O/C = 0–0.2, H/C = 1.7–2.2); Aliphatics (O/C = 0.2–0.6, H/C = 1.5–2.2); lignin (O/C = 0.1–0.6, H/C = 0.6–1.7,  $\text{AI}_{\text{mod}} < 0.67$ ); carbohydrates (O/C = 0.6–1.2, H/C = 1.5–2.2); tannins (O/C = 0.6–1.2, H/C = 0.5–1.5,  $\text{AI}_{\text{mod}} < 0.67$ ); unsaturated hydrocarbons (O/C = 0–0.1, H/C = 0.7–1.5); saturated compounds (H/C > 2.0); polycyclic aromatics (PCAs,  $\text{AI}_{\text{mod}} \geq 0.67$ ); polyphenols (0.67

$\geq AI_{\text{mod}} \geq 0.50$ ); and highly unsaturated compounds ( $AI_{\text{mod}} < 0.50$ ,  $H/C < 1.5$ ) (Seidel et al., 2014; Antony et al., 2014).

The double bond equivalent (DBE) and modified aromaticity index ( $AI_{\text{mod}}$ ) value are calculated as Eqs. S1 and S2 (Koch and Dittmar, 2016; Koch and Dittmar, 2006):

$$DBE = C - 0.5H + 0.5N + 1 \quad (S1)$$

$$AI_{\text{mod}} = (1 + C - 0.5O - S - 0.5H)/(C - 0.5O - S - N - P) \quad (S2)$$

A Kendrick mass defect (KMD) analysis is used to provide an overview of the composition of the identified formulae in NFC samples. The KMD calculations are shown in Eqs. (S3 and S4) (Sleighter and Hatcher, 2007):

$$\text{Kendrick mass (F)} = (\text{observed mass}) \times \frac{\text{nominal mass(F)}}{\text{exact mass(F)}} \quad (\text{Eq. S3})$$

$$KMD = \text{nominal mass} - \text{Kendrick mass (F)} \quad (\text{Eq. S4})$$

where F stands for the functional groups or repeated groups, including COO, OO, CH<sub>2</sub>O, and H<sub>2</sub>O.

The value of  $X_c$  is used to characterize aromatic and polyaromatic compounds in highly complex compound mixtures.  $X_c$  normally ranges from 0 to 3.0 and is calculated as Eqs. (S5) (Yassine et al., 2014):

$$X_c = \frac{3(DBE - mN_O - nN_S) - 2}{DBE - mN_O - nN_S} \quad (\text{Eq. S5})$$

If  $DBE \leq mN_O + nN_S$ , then  $X_c = 0$ . For (-)ESI and (+)ESI mode, we used  $m=n=0.5$  and  $m=n=1.0$  for the  $X_c$  in this study.

The EC-tracer method has been widely used to estimate SOC (Turpin and Lim, 2001), which can be defined as

$$POC = (OC/EC)_{\text{prim}} \times EC \quad (\text{Eq. S6})$$

$$\text{SOC} = \text{OC} - \text{POC} \quad (\text{Eq. S7})$$

where POC, SOC, and OC stands for the estimated primary OC, secondary OC, and measured total OC, respectively.

Figures

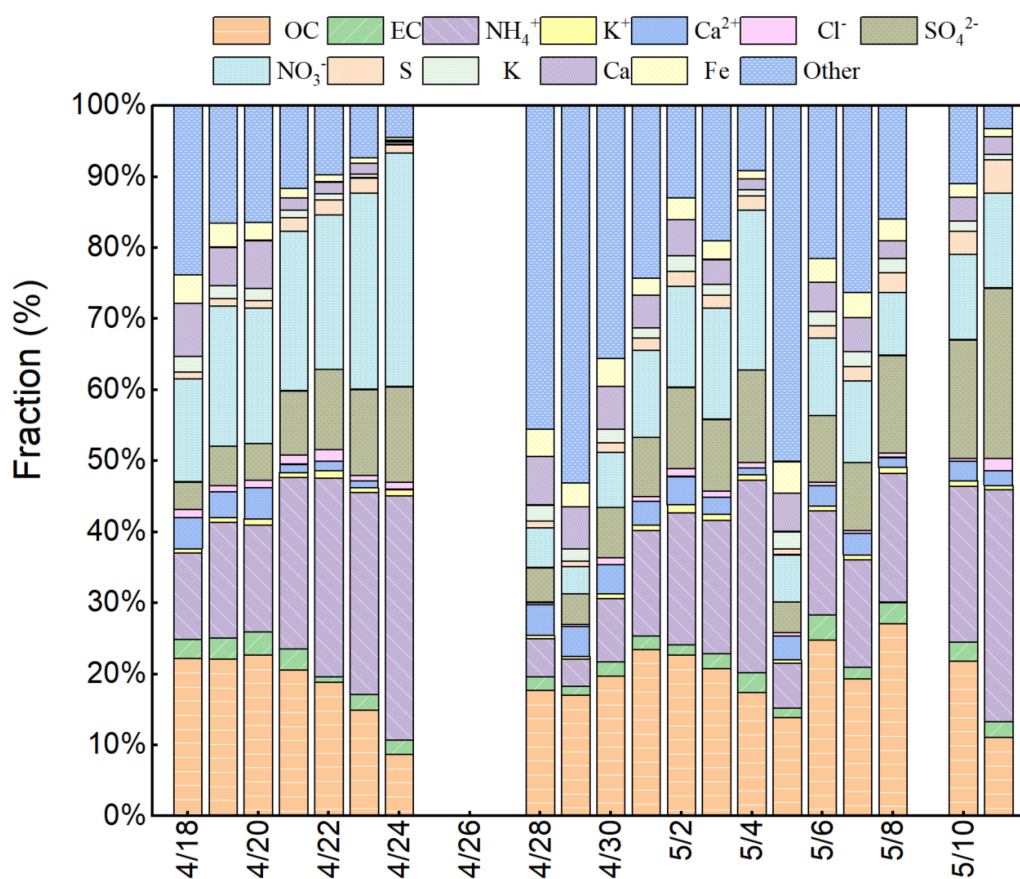

Figure S1. Fraction of OC, EC, water-soluble ions, and crustal elements during the sampling period.

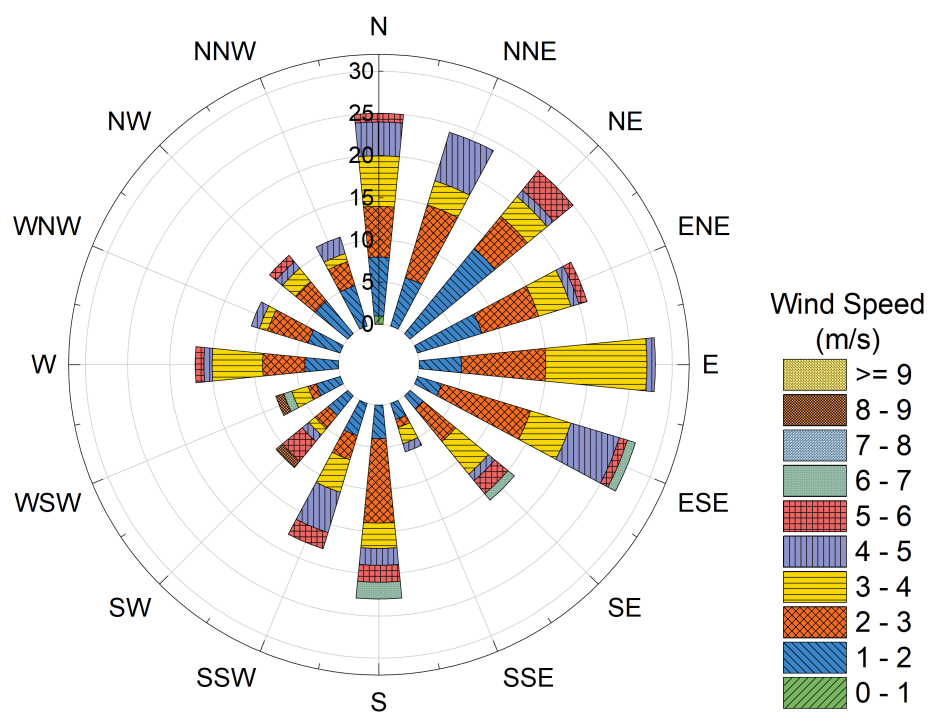

74

75

76 Figure S2. Windrose plot during the sampling period.

77

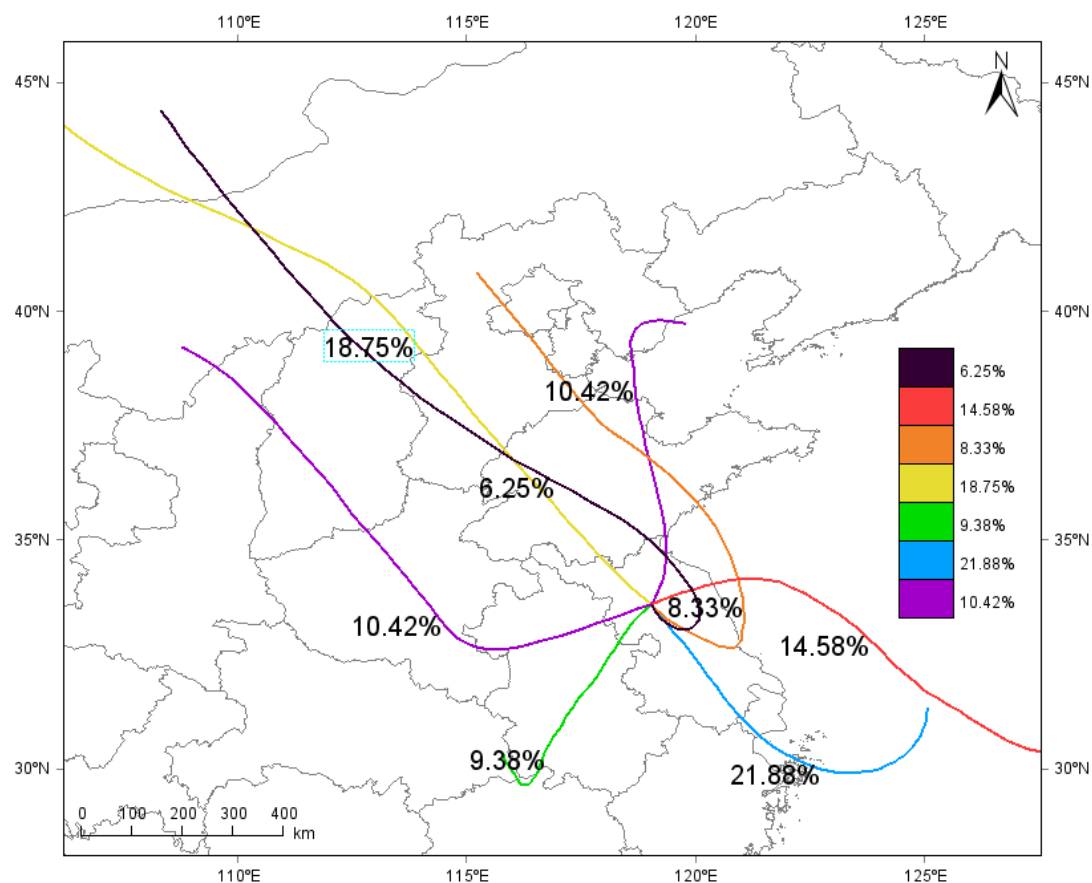

Figure S3. Backward trajectory of air mass passing through the sampling site during the sampling period.

82

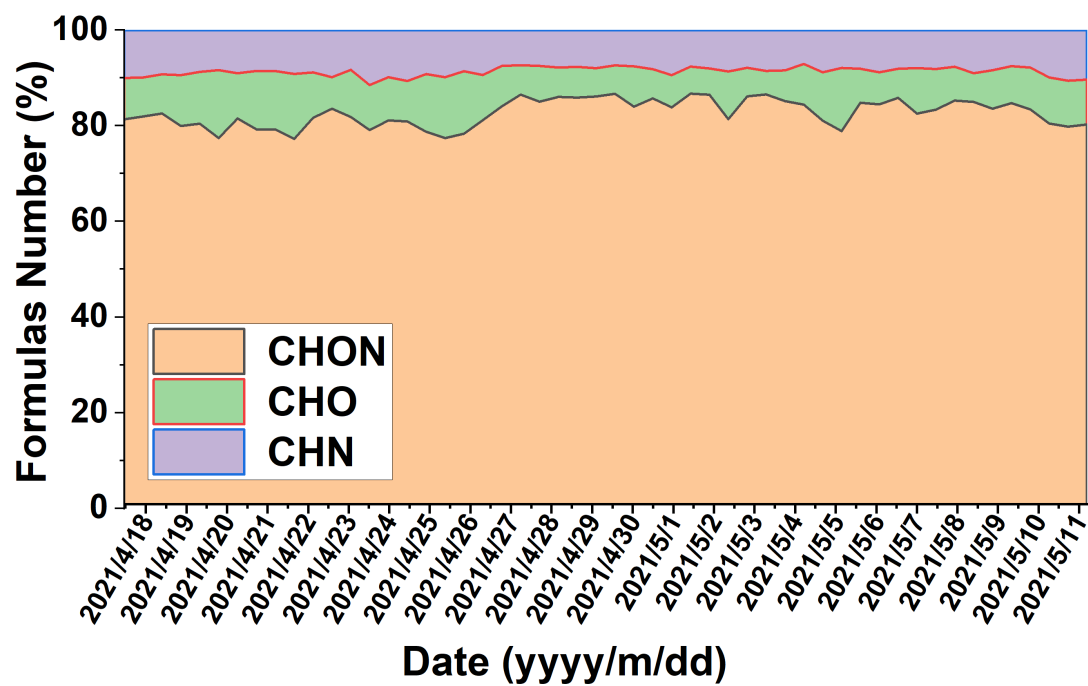

83

84 Figure S4. Ratios of formula numbers among the sampling period.

85

86

87

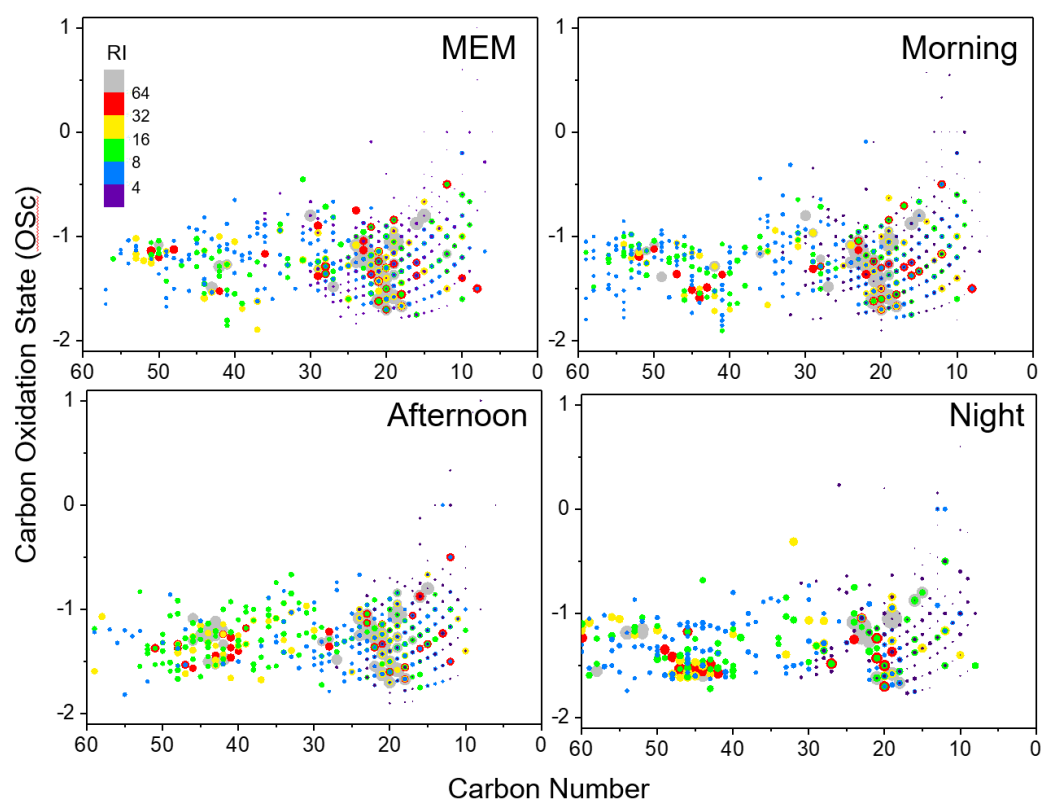

88

89

90 Figure S5. Overlaid carbon oxidation state (OSc) symbols for CHO species. The size  
91 and color bar of the markers reflect the relative peak intensities of molecular formulae  
92 on a logarithmic scale. RI: relative intensity.

93

94

95

96

97

98

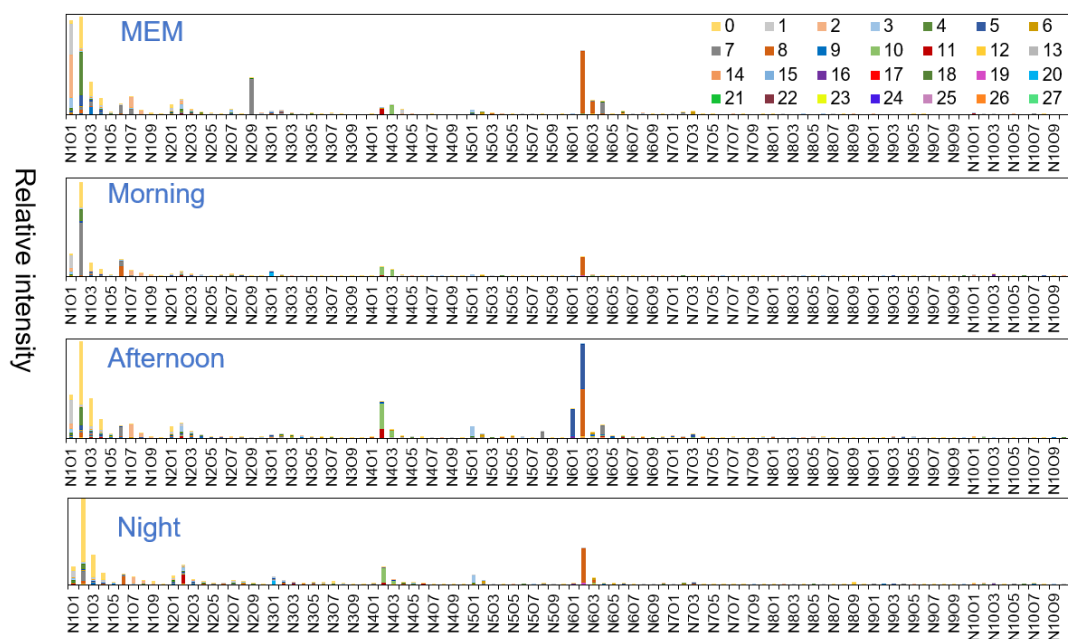

Figure S6. Relative abundance of CHON species in aerosol samples obtained by +ESI FT-ICR MS as well as the double bond equivalent (DBE) distribution. The color bar denotes the DBE value. The height of the symbols reflects the relative peak intensity of molecular formulae.

## References

- Antony, R., Grannas, A. M., Willoughby, A. S., Sleighter, R. L., Thamban, M., and Hatcher, P. G.: Origin and sources of dissolved organic matter in snow on the East Antarctic ice sheet, *Environ. Sci. Technol.*, 48, 6151-6159, 10.1021/es405246a, 2014.
- He, C., Zhang, Y., Li, Y., Zhuo, X., Li, Y., Zhang, C., and Shi, Q.: In-House Standard Method for Molecular Characterization of Dissolved Organic Matter by FT-ICR Mass Spectrometry, *ACS omega*, 5, 11730-11736, 10.1021/acsomega.0c01055, 2020.
- Koch, B. P. and Dittmar, T.: From mass to structure: an aromaticity index for high-resolution mass data of natural organic matter, *Rapid Commun. Mass Spectrom.*, 20, 926-932, 10.1002/rcm.2386, 2006.
- Koch, B. P. and Dittmar, T.: From mass to structure: an aromaticity index for high-resolution mass data of natural organic matter, *Rapid Commun Mass Sp*, 30, 250-250, 10.1002/rcm.7433, 2016.
- Kujawinski, E. B. and Behn, M. D.: Automated analysis of electrospray ionization fourier transform ion cyclotron resonance mass spectra of natural organic matter, *Anal Chem*, 78, 4363-4373, 10.1021/ac0600306, 2006.
- Seidel, M., Beck, M., Riedel, T., Waska, H., Suryaputra, I. G. N. A., Schnetger, B., Niggemann, J., Simon, M., and Dittmar, T.: Biogeochemistry of dissolved organic matter in an anoxic intertidal creek bank, *Geochim.Cosmochim. Acta*, 140, 418-434, 10.1016/j.gca.2014.05.038, 2014.
- Sleighter, R. L. and Hatcher, P. G.: The application of electrospray ionization coupled to ultrahigh resolution mass spectrometry for the molecular characterization of natural organic matter, *Journal of Mass Spectrometry*, 42, 559-574, 2007.
- Yassine, M. M., Harir, M., Dabek-Zlotorzynska, E., and Schmitt-Kopplin, P.: Structural characterization of organic aerosol using Fourier transform ion cyclotron resonance mass spectrometry: aromaticity equivalent approach, *Rapid communications in mass spectrometry : RCM*, 28, 2445-2454, 10.1002/rcm.7038, 2014.
